# Supplementary material for: EFFECT: a randomized phase II study of efficacy and impact on function of two doses of nab-paclitaxel as first-line treatment in older women with advanced breast cancer
Source: Springer Nature journal article supplement (doi:10.1186/s13058-020-01319-1), 2020-08-05
Supplement: MOESM1 [file 18251384]

| CTCAE grade, n (%)           |                    |                 |        |   |  |                     |                 |        |       |  |
|------------------------------|--------------------|-----------------|--------|---|--|---------------------|-----------------|--------|-------|--|
| Adverse Event                | All                | Arm A<br>(n=33) |        |   |  |                     | Arm B<br>(n=33) |        |       |  |
|                              |                    | 2               | 3      | 4 |  |                     | 2               | 3      | 4     |  |
| <b>Anemia</b>                | 29 (88)            | 13 (39)         | 1 (3)  | - |  | 28 (85)             | 14 (42)         | -      | -     |  |
| <b>Leucopenia</b>            | 21 (64)            | 10 (30)         | 2 (6)  | - |  | 23 (70)             | 11 (33)         | 4 (12) | -     |  |
| <b>Neutropenia</b>           | 18 (54.5)          | 6 (18)          | 7 (21) | - |  | 23 (70)             | 9 (27)          | 6 (18) | 2 (6) |  |
| <b>Fatigue</b>               | 25 (76)            | 10 (30)         | 5 (15) | - |  | 27 (82)             | 18 (55)         | 2 (6)  | -     |  |
| <b>Peripheral neuropathy</b> | 15 (45)            | 3 (9)           | 2 (6)  | - |  | 22 (67)             | 10 (30)         | 4 (12) | -     |  |
| <b>Nausea/vomiting</b>       | 13 (39)            | 5 (15)          | -      | - |  | 11 (33)             | 5 (15)          | 1 (3)  | -     |  |
| <b>Alopecia</b>              | 13 (39)            | 8 (24)          | /      | / |  | 17 (51.5)           | 8 (24)          | /      | /     |  |
| <b>Myalgia/arthralgia</b>    | 14 (42)            | 5 (15)          | 1 (3)  | - |  | 15 (45)             | 1 (3)           | -      | -     |  |
| <b>Dyspnoea</b>              | 7 (21)             | 2 (6)           | -      | - |  | 8 (24)              | -               | 1 (3)  | -     |  |
| <b>Fever</b>                 | 5 (15)             | 1 (3)           | -      | - |  | 5 (15)              | -               | 1 (3)  | -     |  |
| <b>Hepatotoxicity</b>        | 5 (15)             | 1 (3)           | 1 (3)  | - |  | 6 (18)              | 1 (3)           | 1 (3)  | -     |  |
| <b>Infection</b>             | 3 (10)             | -               | 2 (6)  | - |  | 4 (12)              | 1 (3)           | -      | -     |  |
| <b>Diarrhoea</b>             | 4 (12)             | 2 (6)           | 2 (6)  | - |  | 3 (10) <sup>o</sup> | 1 (3)           | -      | -     |  |
| <b>Renal toxicity</b>        | 1 (3) <sup>o</sup> | -               | -      | - |  | 1 (3)               | -               | -      | -     |  |
| <b>Febrile neutropenia</b>   | 1 (3)              | /               | 1 (3)  | - |  | 1 (3)               | /               | 1 (3)  | -     |  |

**Supplementary Table 1 (S1):** Distribution of AEs by arm in patients aged  $\geq 75$  years

Abbreviations: CTCAE, Common Terminology Criteria for Adverse Events; /, grade does not exist for this adverse event; <sup>o</sup> grade 5 n=1
